# Supplementary material
Source: publisher figshare collection journal article supplement (https://karger.figshare.com/ndownloader/files/27061955)
Supplement: Supplementary file 1 [file 27061955]

Supplementary Table 6 Sensitive analysis of perineural invasion

| Study omitted | HR (95%CI) |
| --- | --- |
| Dong et al 2019 | 3.91 [2.30, 6.66] |
| Genç et al 2018 | 3.41 [1.72, 6.77] |
| Lopez-Aguiar 2019 | 3.86 [2.04, 7.29] |
| Pulvirenti et al 2019 | 2.72 [1.68, 4.41] |
| Zou et al 2020 | 3.05 [1.65, 5.63] |
| Combined | 3.39 [1.97, 5.84] |
